# Supplementary material for: microRNA-497 slows esophageal cancer development and reverses chemotherapy resistance through its target QKI
Source: publisher site journal article supplement (doi:10.18632/aging.204713), 2023-05-11
Supplement: Supplementary file [file aging-v15i9-204713-supplementary-material-SD1.pdf]

**SUPPLEMENTARY FIGURES**

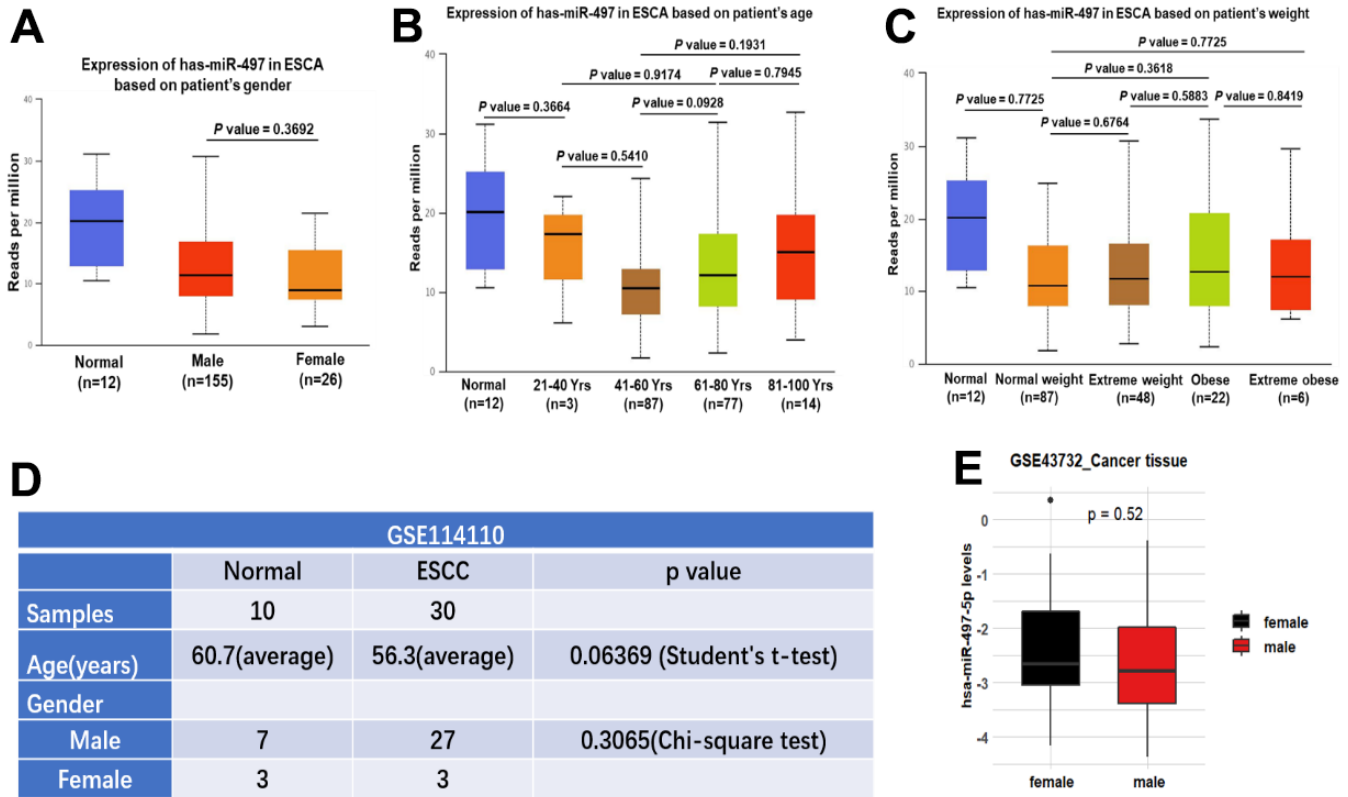

**Supplementary Figure 1. The miR-497 expression levels in human esophageal cancer tissues in subjects with different gender, ages, or weight. (A–C)** There was no significant difference of miR-497 expression levels in the subjects with different gender, ages, or weight using TCGA data. **(D, E)** The different levels of miR-497 levels were obtained by analyzing GSE114110 and GSE43732 datasets.

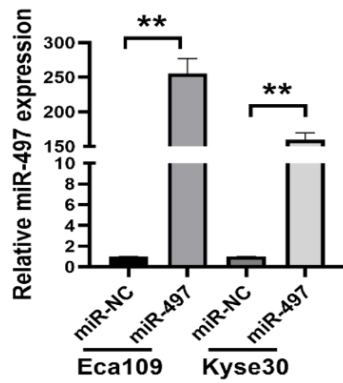

**Supplementary Figure 2. Overexpression of miR-497 in Eca109 and Kyse30 cells.** Q-PCR assay was used to analyze expression levels of miR-497 in esophageal cancer cells. Data were representative of 3 independent experiments. \*\* indicated significant difference of miR-497 levels compared to the control at  $p < 0.01$ .

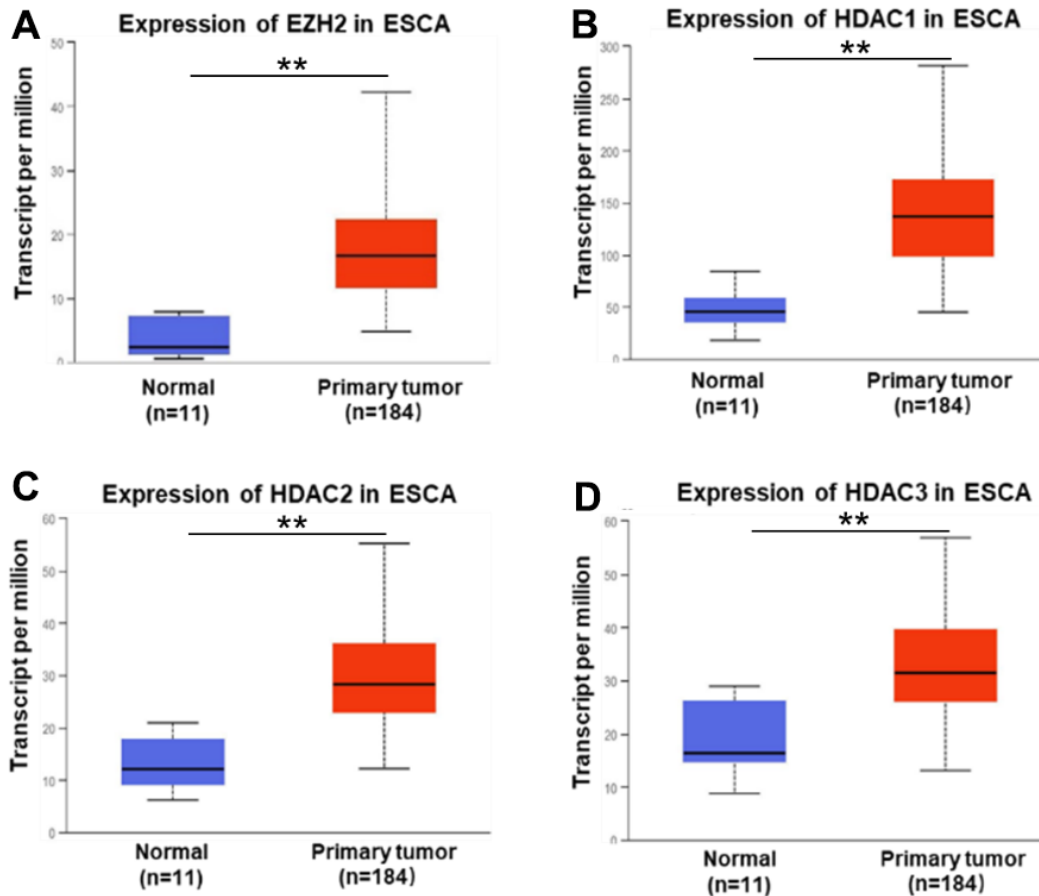

**Supplemental Figure 3. The expression levels of HDACs and EZH2 in esophageal cancer tissues.** (A–D) The expression levels of EZH2 and HDACs (HDAC1, HDAC2, HDAC3) were analyzed in esophageal cancer and normal tissues by using TCGA database. \*\* indicated significant difference of these molecule expression levels compared to the control at  $p < 0.01$ .
